# Supplementary material
Source: PubMed Central journal article supplement (PMC4682304)
Supplement: supp_tpc.15.00591_TPC2015-00591-LSBR1_Supplemental_Data.pdf [file supp_tpc.15.00591_TPC2015-00591-LSBR1_Supplemental_Data.pdf]

## SUPPLEMENTAL FIGURES

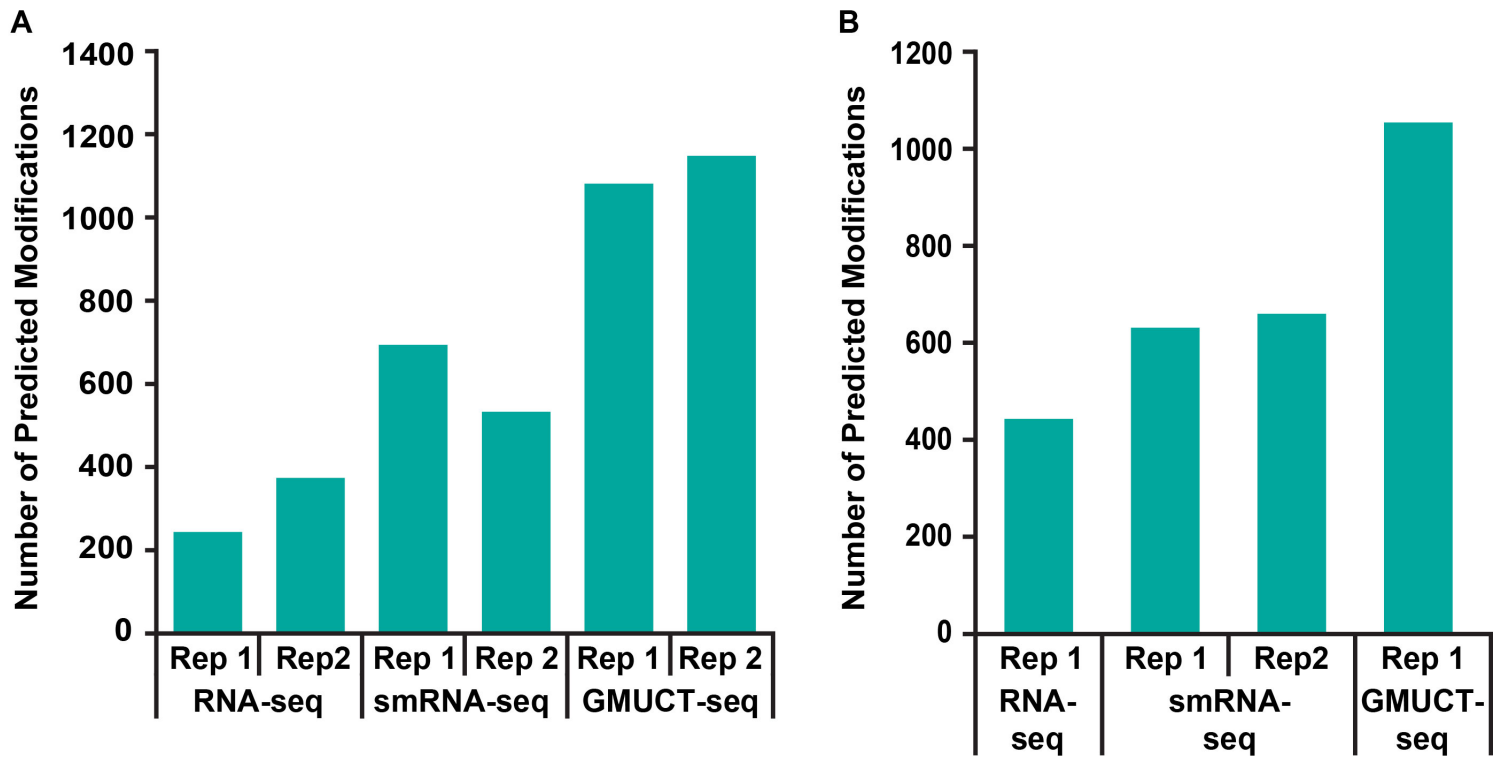

**Supplemental Figure 1:** HAMR-predicted modifications in two human cell lines. (A-B) Total number of HAMR-predicted modification sites from analyzing the three RNA-seq datasets (RNA-seq, smRNA-seq, and GMUCT) for HeLa (A) and HEK293T (B) cells.

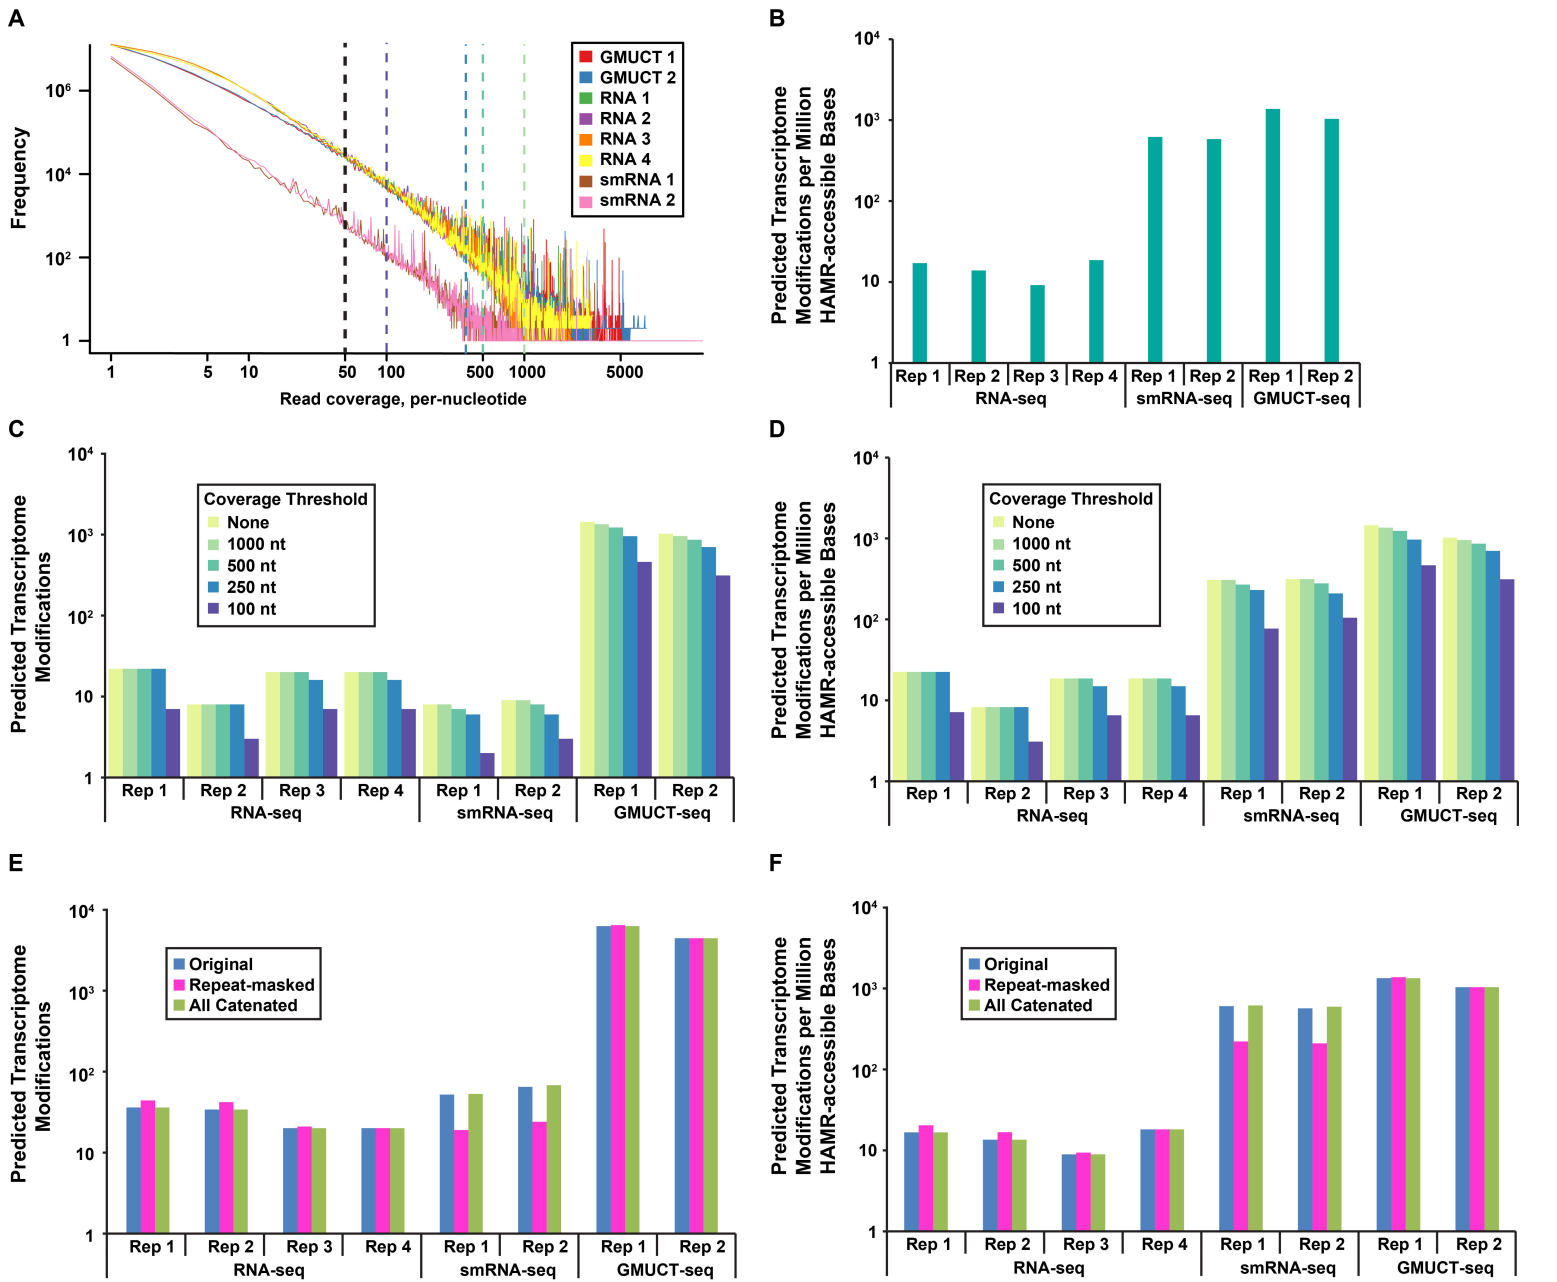

**Supplemental Figure 2:** Differences in number of HAMR-predicted modifications are not artifacts of differences in library preparation, overall size, or transcriptome coverage. (A) All *Arabidopsis* libraries were randomly down-sampled to the number of reads from the smallest library (~3 million), and a histogram of coverage at all TAIR10 mRNA transcriptome bases is plotted in log-log scale. The black dashed line indicates the 50x minimum coverage observed at a HAMR-predicted modification site (HAMR accessible bases), and colored dashed lines indicate various maximum coverage thresholds used in C and D. (B) Total number of HAMR modifications identified for each RNA-seq dataset were normalized to the number of HAMR accessible bases available from those experiments. (C) HAMR was rerun on down-sampled data, and modifications with greater than 100x, 250x, 500x, or 1000x coverage were excluded from the analysis. (D) Total number of HAMR modifications identified for each RNA-seq dataset after down-sampling were normalized to the number of HAMR accessible bases available from those experiments, and modifications with greater than 100x, 250x, 500x, or 1000x coverage were excluded from the analysis. (E) To exclude artifacts from mapping and read handling, HAMR was rerun on data from the three RNA-seq approaches that had been mapped to a repeat-masked (Smit, AFA, Hubley, R & Green, P. (2013) RepeatMasker Open-4.0. <http://www.repeatmasker.org>) TAIR10 transcriptome, and on RNA-seq and smRNA-seq data for which adapter-trimmed and untrimmed reads were concatenated in the same way that was done for GMUCT data (see methods). (F) The same analysis as in E in which the total number of HAMR modifications identified for each RNA-seq dataset were normalized to the number of HAMR accessible bases available from those experiments.

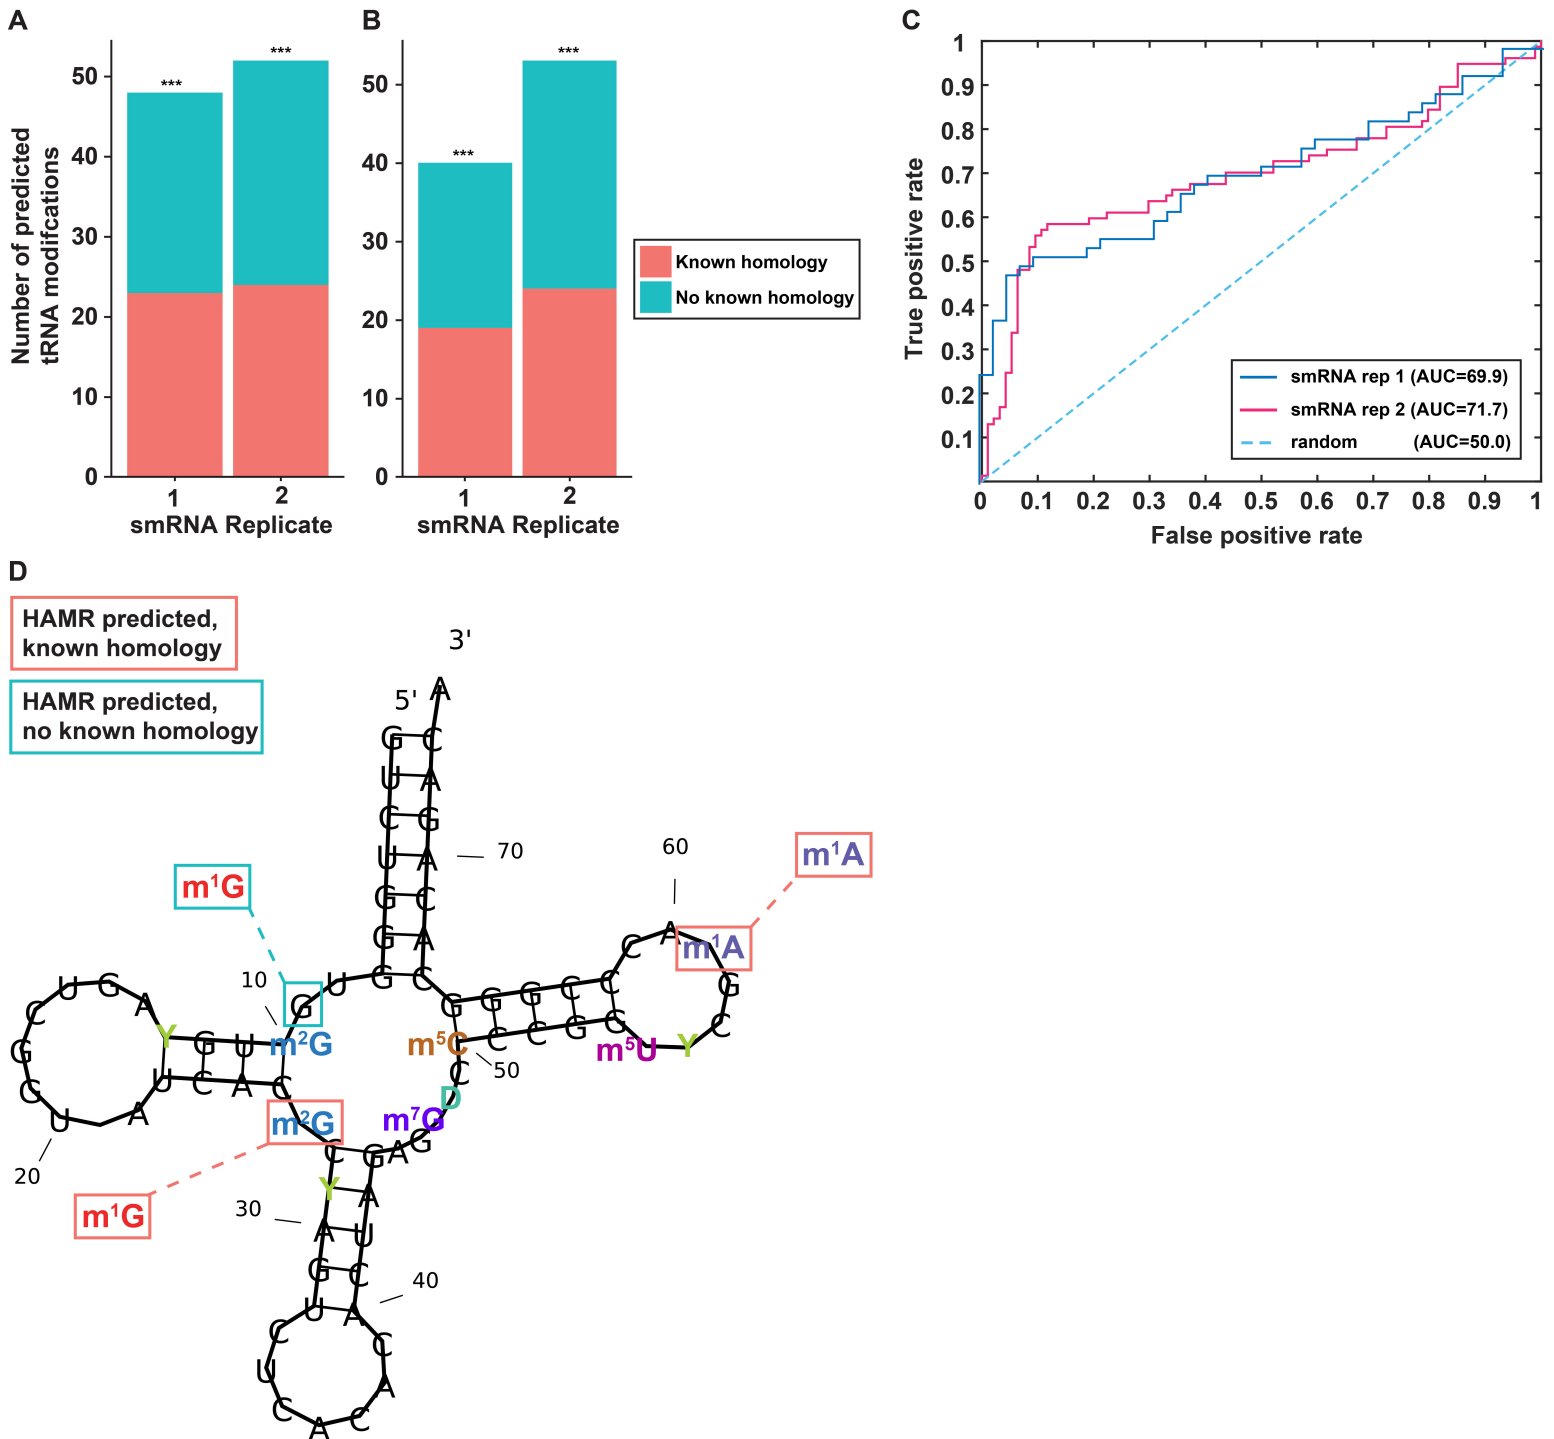

**Supplemental Figure 3:** HAMR captures a large proportion of known tRNA modification sites in the *Arabidopsis* transcriptome. HAMR modifications from (A) our smRNA sequencing data and (B) a previously published, tissue matched smRNA sequencing dataset (Li et al., 2014) are overlapped with known tRNA modifications, as determined by homology to yeast tRNAs. The total number of HAMR-predicted modifications are plotted on the y-axis. P-values were calculated by Fisher's exact test, over a background of all tRNA consensus bases (see methods). \*\*\* denotes p-value <  $1 \times 10^{-7}$ . (C) Receiver operating characteristic curves for datasets from both replicates of our smRNA-seq experiments. AUC = area under curve. (D) An example tRNA, *tRNA-Val* (anticodon: CAC), with known modifications labeled as bold, colored letters across the structure backbone (black line). HAMR-predicted modification sites are labeled as known (red boxes) or novel (light blue boxes) with boxes across the structure backbone, while HAMR predicted modification types at those predicted nucleotide positions are shown as outlying boxes connected with dashed lines.

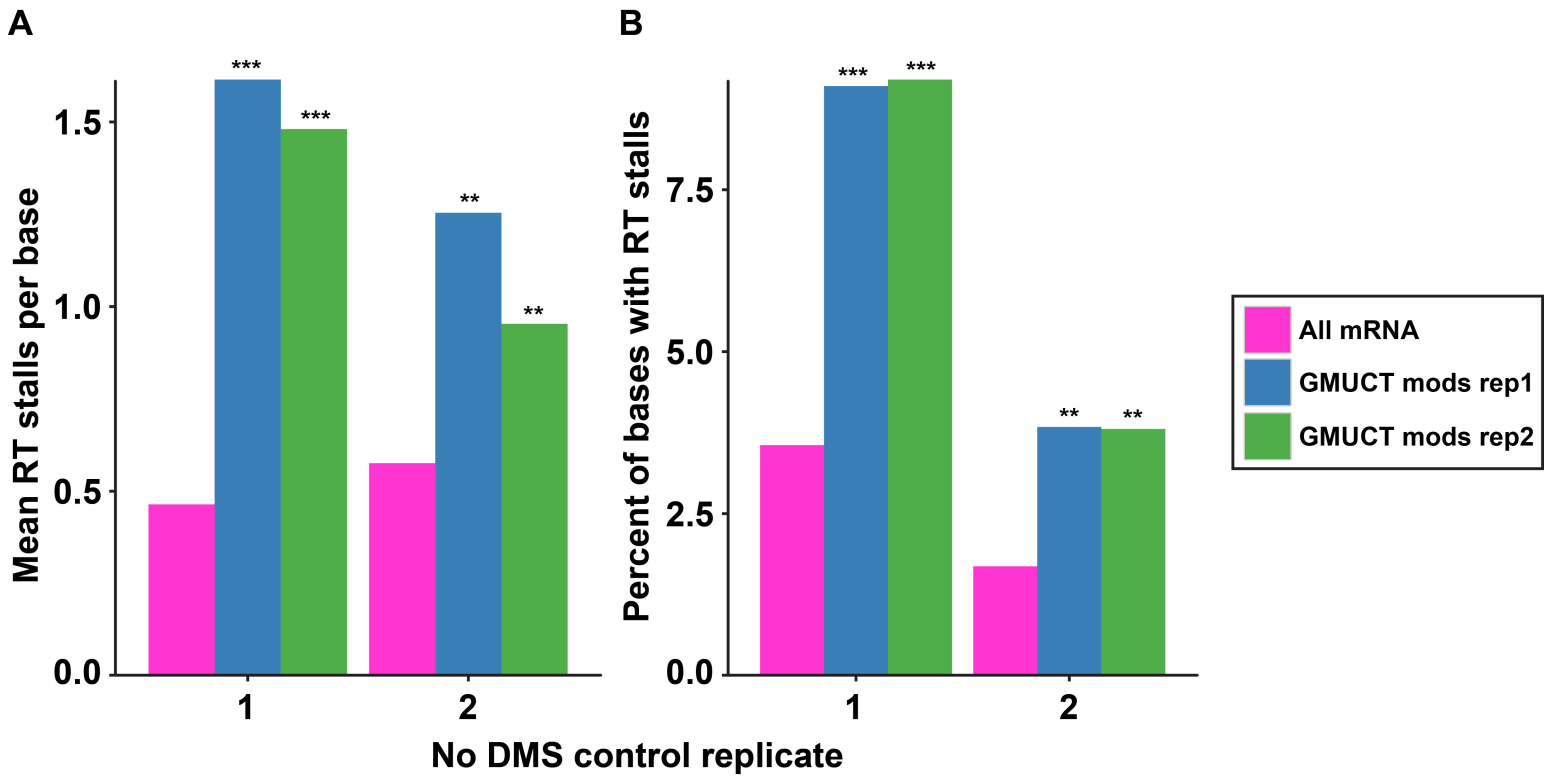

**Supplemental Figure 4:** Sites of HAMR-predicted modifications are enriched in reverse transcriptase (RT) stalls. RT stalls from no DMS control experiment datasets for Structure-seq (Ding et al., 2014) are tabulated across all mRNA bases (magenta bars), and across mRNAs predicted to contain modifications based upon GMUCT sequencing (blue and green bars). (A) The mean RT stalls per base and (B) the percent of bases with any number of RT stalls are plotted. Significance was determined for A with a Wilcoxon Rank Sum test (mean RT stalls per base) and for B with a Fisher's exact test (percent of bases with RT stalls) over a background of all mRNA bases. \*\* denotes p-value  $< 1 \times 10^{-20}$  and \*\*\* denotes p-value  $< 1 \times 10^{-50}$ .

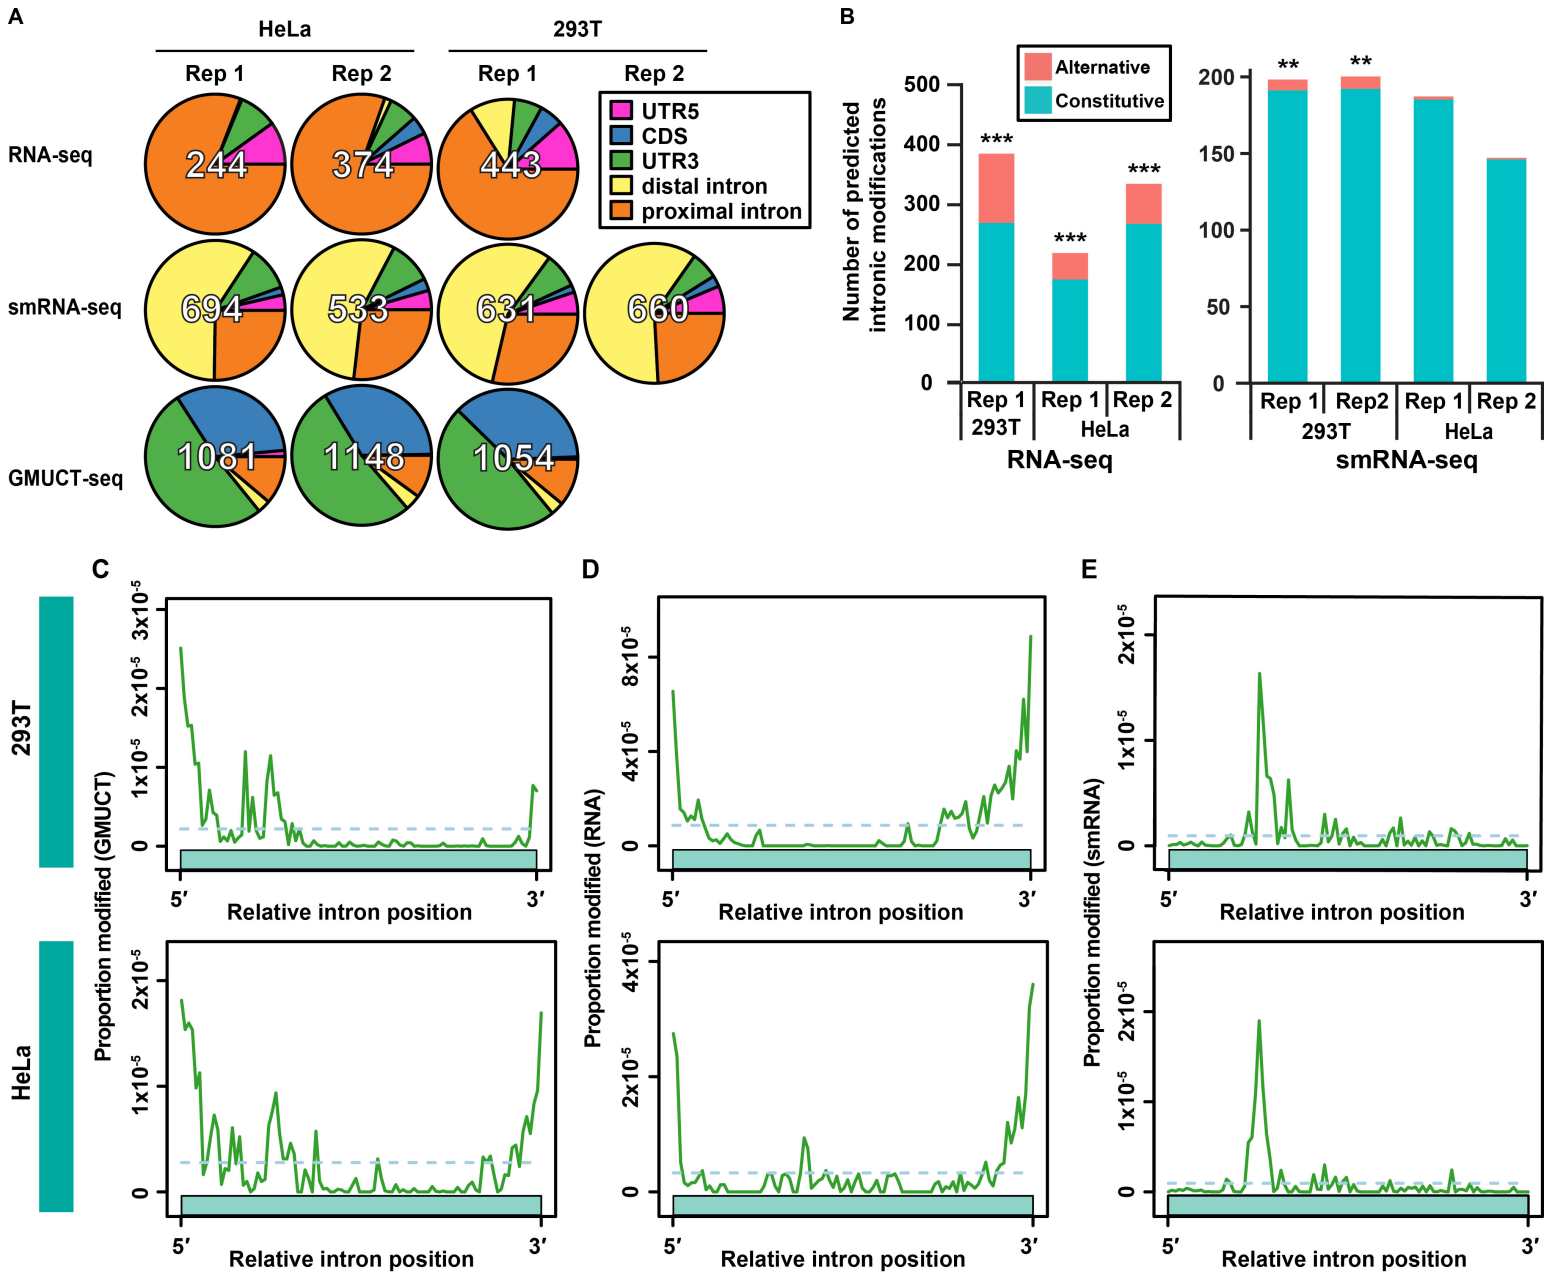

**Supplemental Figure 5:** HAMR-predicted modifications in two human cell lines mark uncapped and alternatively spliced transcripts. (A) The relative transcript location of predicted modification sites in mRNAs. Modifications that lie outside of mRNAs were excluded from this analysis. Intronic modification sites are proximal if within 500 nucleotides (nt) of a known constitutive or alternative splice donor/acceptor site, and distal if further than 500 nt from these sites. (B) Localization of HAMR-predicted modification sites identified using RNA-seq (left) and smRNA-seq (right) datasets within alternative compared to constitutive introns as annotated in hg19. Enrichment was calculated with a Fisher's exact test. \*\* denotes  $p$ -value  $< 1 \times 10^{-10}$  and \*\*\* denotes  $p$ -value  $< 1 \times 10^{-50}$ . (C-E) Relative position of intron-localized HAMR-predicted modification sites using the data from (C) GMUCT, (D) RNA-seq, and (E) smRNA-seq plotted across the length-normalized average of all hg19 introns.

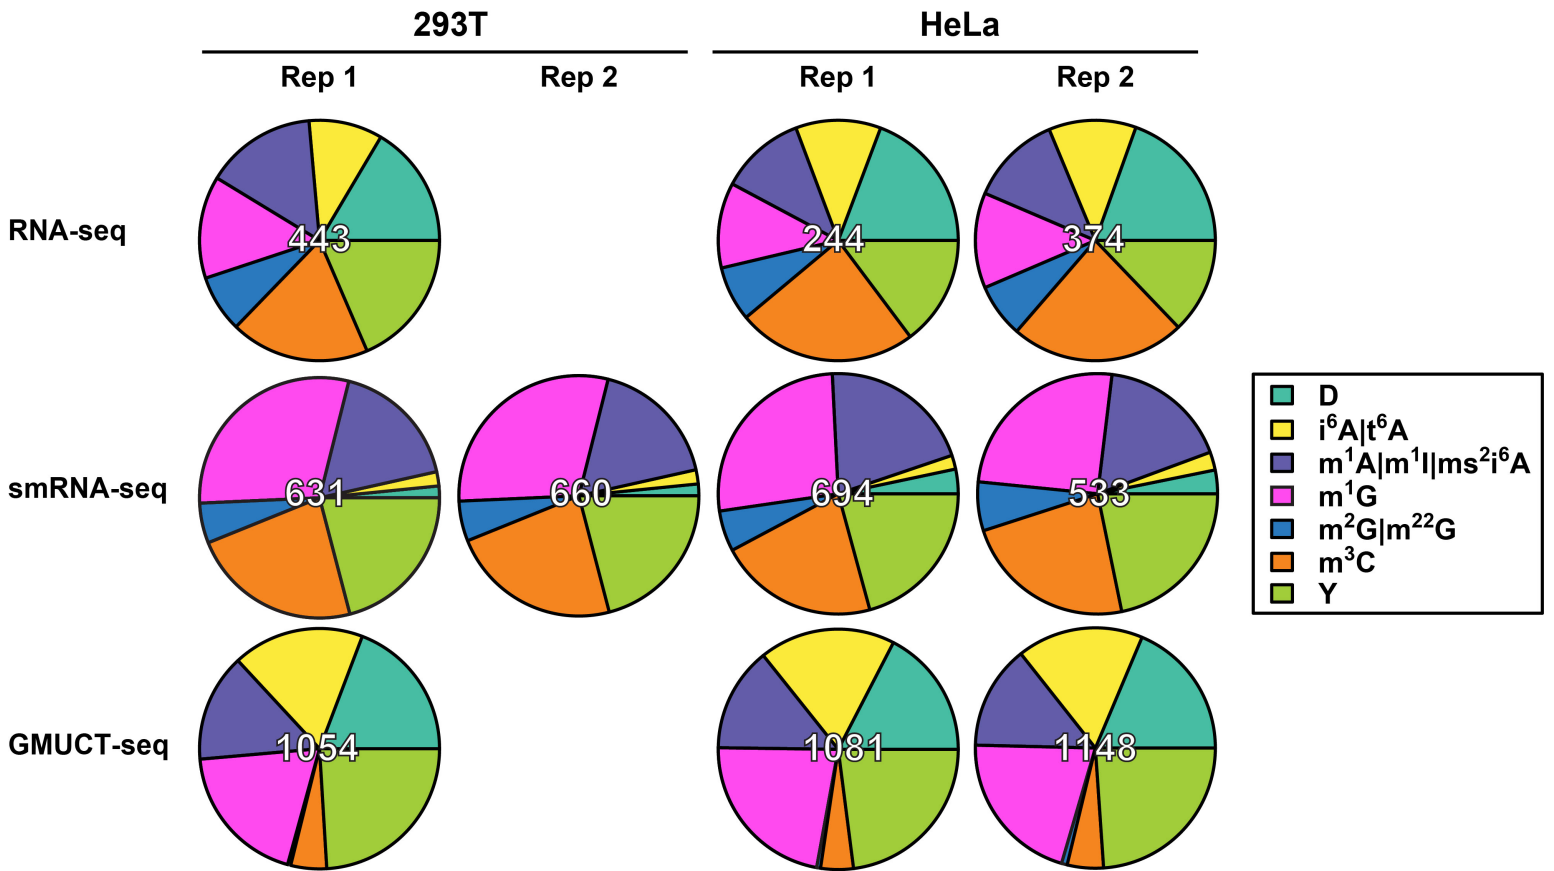

**Supplemental Figure 6:** HAMR predicts a variety of known and novel modification types in the human transcriptome. Distribution of the specific identities of HAMR-predicted modification sites, as determined by a nearest-neighbor classification approach trained on known tRNA modifications from *Saccharomyces cerevisiae*.

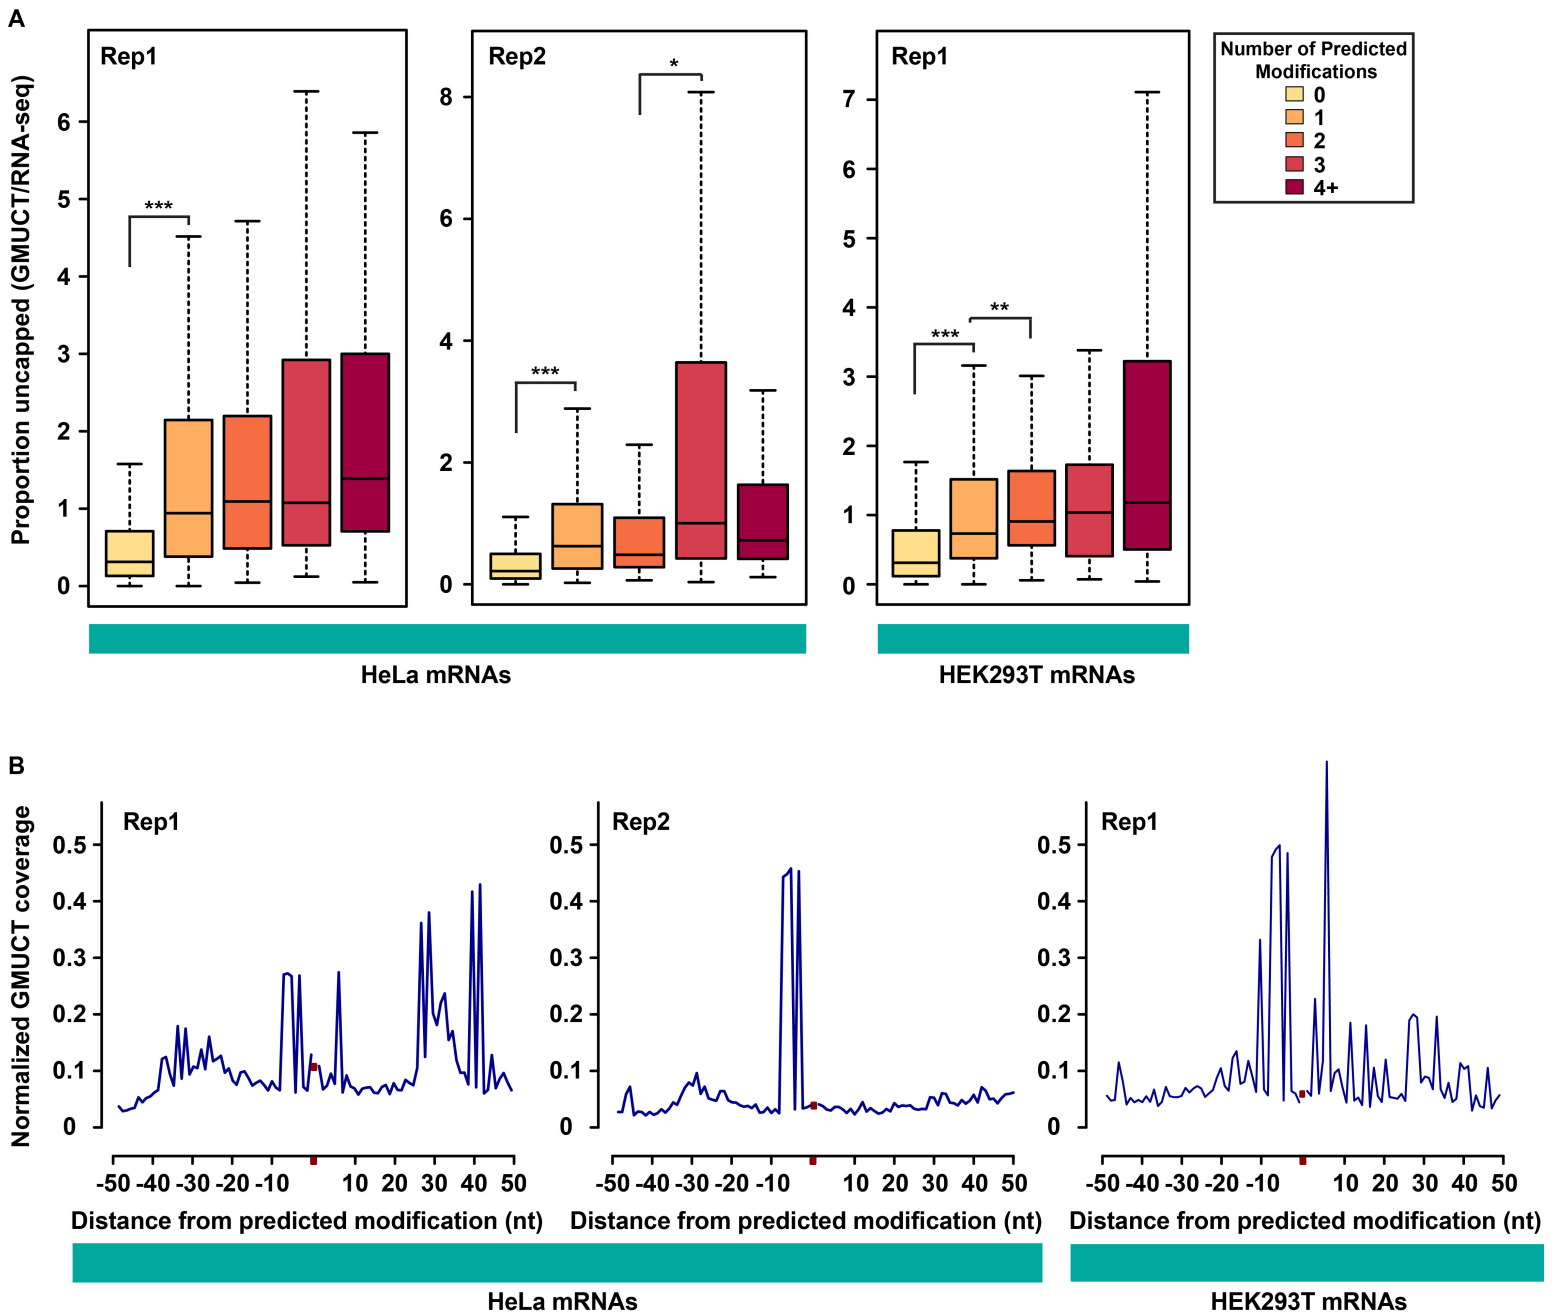

**Supplemental Figure 7:** Human RNAs with HAMR-predicted modifications have higher levels of uncapped transcripts. (A) Distribution of the proportion of uncapped transcripts (total GMUCT reads per transcript normalized to total RNA-seq reads) for protein-coding mRNAs. Modifications in noncoding RNAs were too sparse to test. P-values were calculated with a Wilcoxon Rank Sum test; \* denotes p-value < 0.05, \*\* denotes p-value < 0.001, \*\*\* denotes p-value <  $1 \times 10^{-5}$ . (B) Averaged GMUCT coverage profiles 50 bp up- and downstream of all predicted mRNA modification sites, normalized to RNA-seq read abundance. Red dots indicate the position of the predicted modification, and are plotted within 50 bp up- and downstream flanking regions. Modifications within 50 bp of the mRNA 5' or 3' ends were given correspondingly shorter flanking regions.

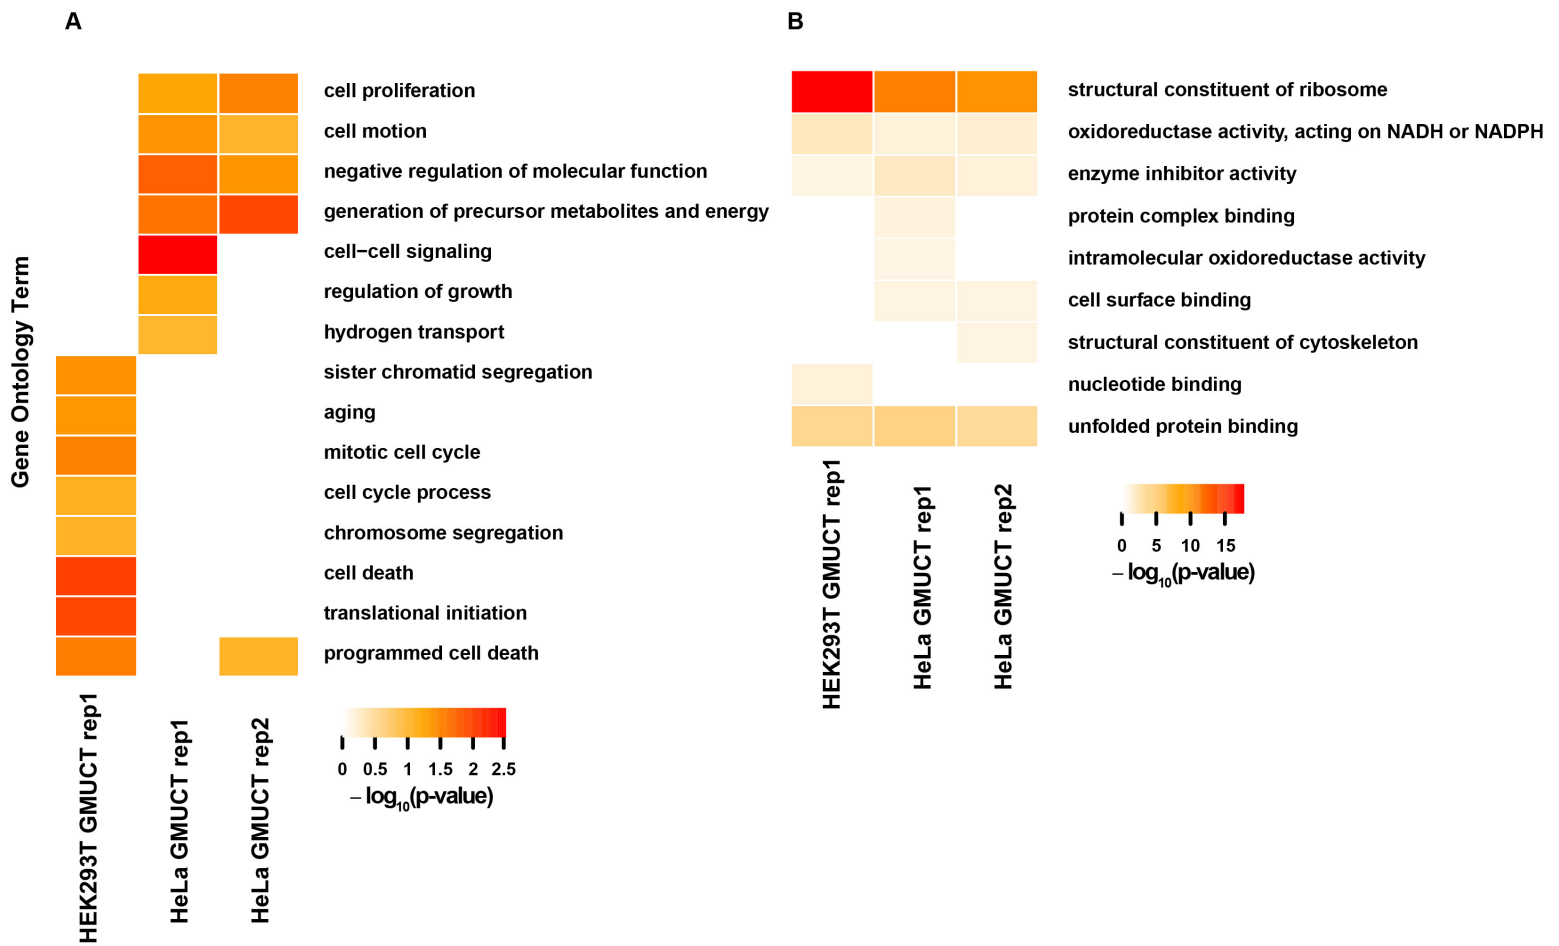

**Supplemental Figure 8:** Human transcripts with HAMR-predicted modifications encode proteins with coherent functions. (A) Biological process and (B) molecular function Gene Ontology (GO) terms are reported if they are significantly enriched ( $\text{FDR} < 0.05$ ), over a background of all “HAMR accessible transcripts” with at least 10 uniquely mapping reads. Analyses were performed using the DAVID package (Huang, Sherman, and Lempicki, 2009). Furthermore, terms are only reported if they are separated from their ancestor term by no more than two parents, as determined by a depth first search as previously described (Vandivier et al., 2013). Lack of color denotes lack of significance.



**Supplemental Table 1:** HAMR correctly classifies a portion of homology-based predicted tRNA locus modification sites. Family-based predicted tRNA loci in Arabidopsis were intersected with HAMR machine learning-based predictions.

**A. Arabidopsis smRNA Replicate 1.**

| tRNA family            | Relative Start | Relative Stop | HAMR-predicted Modification | Actual Modification | Correct? |
|------------------------|----------------|---------------|-----------------------------|---------------------|----------|
| AT_Ala_TGC_consensus_0 | 25             | 26            | m1G                         | m2,2G               | N        |
| AT_Arg_ACG_consensus_0 | 57             | 58            | m1A m1  ms2i6A              | m1A                 | Y        |
| AT_Arg_TCT_consensus_0 | 57             | 58            | m1A m1  ms2i6A              | m1A                 | Y        |
| AT_Asn_GTT_consensus_0 | 26             | 27            | m1G                         | m2,2G               | N        |
| AT_Gly_GCC_consensus_0 | 8              | 9             | m1G                         | m1G                 | Y        |
| AT_Leu_CAA_consensus_0 | 64             | 65            | Y                           | m5U                 | N        |
| AT_Leu_TAA_consensus_0 | 25             | 26            | m1G                         | m2,2G               | N        |
| AT_Leu_TAG_consensus_0 | 26             | 27            | m1G                         | m2,2G               | N        |
| AT_Leu_TAG_consensus_0 | 64             | 65            | m1A m1  ms2i6A              | m1A                 | Y        |
| AT_Lys_CTT_consensus_0 | 25             | 26            | m1G                         | m2,2G               | N        |
| AT_Lys_CTT_consensus_0 | 57             | 58            | m1A m1  ms2i6A              | m1A                 | Y        |
| AT_Lys_TTT_consensus_0 | 56             | 57            | m1A m1  ms2i6A              | m1A                 | Y        |
| AT_Met_CAT_consensus_0 | 8              | 9             | m1G                         | m1G                 | Y        |
| AT_Phe_GAA_consensus_0 | 25             | 26            | m1G                         | m2,2G               | N        |
| AT_Pro_TGG_consensus_0 | 32             | 33            | D                           | xU                  | N        |
| AT_Pro_TGG_consensus_0 | 56             | 57            | m1A m1  ms2i6A              | m1A                 | Y        |
| AT_Ser_AGA_consensus_0 | 25             | 26            | m1G                         | m2,2G               | N        |
| AT_Ser_GCT_consensus_0 | 66             | 67            | m1A m1  ms2i6A              | m1A                 | Y        |
| AT_Trp_CCA_consensus_0 | 56             | 57            | m1A m1  ms2i6A              | m1A                 | Y        |
| AT_Val_AAC_consensus_0 | 58             | 59            | m1A m1  ms2i6A              | m1A                 | Y        |
| AT_Val_CAC_consensus_0 | 26             | 27            | m1G                         | m2G                 | N        |
| AT_Val_CAC_consensus_0 | 58             | 59            | m1A m1  ms2i6A              | m1A                 | Y        |
| AT_Val_TAC_consensus_0 | 57             | 58            | m1A m1  ms2i6A              | m1A                 | Y        |

**B. Arabidopsis smRNA Replicate 2.**

| tRNA family            | Relative Start | Relative Stop | HAMR-predicted Modification | Actual Modification | Correct? |
|------------------------|----------------|---------------|-----------------------------|---------------------|----------|
| AT_Ala_AGC_consensus_0 | 33             | 34            | m1A m1  ms2i6A              | l                   | N        |
| AT_Ala_TGC_consensus_0 | 25             | 26            | m1G                         | m2,2G               | N        |
| AT_Arg_ACG_consensus_0 | 57             | 58            | m1A m1  ms2i6A              | m1A                 | Y        |
| AT_Arg_CCT_consensus_0 | 25             | 26            | m1G                         | m2,2G               | N        |
| AT_Arg_TCT_consensus_0 | 57             | 58            | m1A m1  ms2i6A              | m1A                 | Y        |
| AT_Asn_GTT_consensus_0 | 26             | 27            | m2G m22G                    | m2,2G               | Y        |
| AT_Gly_GCC_consensus_0 | 8              | 9             | m1G                         | m1G                 | Y        |
| AT_Leu_TAA_consensus_0 | 25             | 26            | m1G                         | m2,2G               | N        |
| AT_Leu_TAG_consensus_0 | 26             | 27            | m1G                         | m2,2G               | N        |
| AT_Leu_TAG_consensus_0 | 64             | 65            | m1A m1  ms2i6A              | m1A                 | Y        |
| AT_Lys_CTT_consensus_0 | 25             | 26            | m1G                         | m2,2G               | N        |
| AT_Lys_CTT_consensus_0 | 57             | 58            | m1A m1  ms2i6A              | m1A                 | Y        |
| AT_Lys_TTT_consensus_0 | 56             | 57            | m1A m1  ms2i6A              | m1A                 | Y        |
| AT_Met_CAT_consensus_0 | 8              | 9             | m1G                         | m1G                 | Y        |
| AT_Phe_GAA_consensus_0 | 25             | 26            | m1G                         | m2,2G               | N        |
| AT_Pro_TGG_consensus_0 | 32             | 33            | D                           | xU                  | N        |
| AT_Pro_TGG_consensus_0 | 56             | 57            | m1A m1  ms2i6A              | m1A                 | Y        |
| AT_Ser_AGA_consensus_0 | 25             | 26            | m1G                         | m2,2G               | N        |
| AT_Ser_GCT_consensus_0 | 66             | 67            | m1A m1  ms2i6A              | m1A                 | Y        |
| AT_Trp_CCA_consensus_0 | 56             | 57            | m1A m1  ms2i6A              | m1A                 | Y        |
| AT_Val_AAC_consensus_0 | 58             | 59            | m1A m1  ms2i6A              | m1A                 | Y        |
| AT_Val_CAC_consensus_0 | 26             | 27            | m1G                         | m2G                 | N        |
| AT_Val_CAC_consensus_0 | 58             | 59            | m1A m1  ms2i6A              | m1A                 | Y        |
| AT_Val_TAC_consensus_0 | 57             | 58            | m1A m1  ms2i6A              | m1A                 | Y        |

**Supplemental Table 2:** Primer sequences used for RT-qPCR.

| <b>Target</b>                             | <b>Primer</b>         |
|-------------------------------------------|-----------------------|
| AT1G43170 forward                         | TGGGCACAGCATTTGAGTGA  |
| AT1G43170 reverse                         | ACTGCTTAGCGTACCCAGTG  |
| AT4G25080 forward                         | CCCAGGGCCATCAAAGCTA   |
| AT4G25080 reverse                         | TCCAGCCGACTTTACCCAAC  |
| AT4G25080 forward (additional primer set) | TCGTGGAAGACATGCAGATTC |
| AT4G25080 reverse (additional primer set) | GTTTGTACAGACCGTCCTCCT |
| AT1G04410 forward                         | GCTGCAATCATCAAGGCGAG  |
| AT1G04410 reverse                         | TGAAACGAACGTACCCCTC   |
| AT1G04410 forward (additional primer set) | ACAACAGGGCTTTGGGACAG  |
| AT1G04410 reverse (additional primer set) | GACAGGCTTCTCTCCAGACG  |
| AT1G15220 forward                         | CAACACGAGCCCGAAGAGT   |
| AT1G15220 reverse                         | AGAAAGTGAACGACTGAGGCT |
| AT1G28330 forward                         | GCGGAAGATCAGGTCACCAT  |
| AT1G28330 reverse                         | TGGGGTGTTCGAGGTTGTA   |
| AT1G28330 forward (additional primer set) | TAAAGACGCTCCTCCACACG  |
| AT1G28330 reverse (additional primer set) | GAGCAGCAGTAAGGTGGTGA  |
| AT2G15580 forward                         | GAGAACTTGACGGAGCAGC   |
| AT2G15580 reverse                         | TGTACGTGGTGGGATTCTCAG |
| AT3G15353 forward                         | CTGTGCTGACAAGACCCAGT  |
| AT3G15353 reverse                         | CTCCTGAGTCTCGACGATGT  |
| AT4G08620 forward                         | CCCGGAATCTTGATCATCC   |
| AT4G08620 reverse                         | CGGCATGCCATATTCCTTAG  |
| AT3G21170 forward                         | TGAGGCAGGGTCGTCTTATC  |
| AT3G21170 reverse                         | CACGCCACTGGTGATATTTG  |
| AT1G66850 forward                         | GCCATCAAAGCCGAAGACAC  |
| AT1G66850 reverse                         | ACGCAGGGTTCTTAGCGAAA  |
| AT3G20865 forward                         | GGAGTCTCCAGCACCATCAC  |
| AT3G20865 reverse                         | GAAGAGCCAAGAAGGCGGAG  |
| AT5G39420 forward                         | CAAGGAGATTGGGCGGTTCT  |
| AT5G39420 reverse                         | CCAATTCTGGAACGCCTCT   |
| AT4G31070 forward                         | CTGAAGGGTTTGGTGTCCGA  |
| AT4G31070 reverse                         | CTGTGAAGCCATTGGTCCCT  |
| tRNA-Arg (anticodon: AGT) forward         | CCGCGTGGCCTAATGGATAA  |
| tRNA-Arg (anticodon: AGT) reverse         | GATCACGGTGGGACTCGAAC  |
| tRNA-Trp (anticodon: CCA) forward         | GATCCGTGGCGCAATGGTAG  |
| tRNA-Trp (anticodon: CCA) reverse         | TGAACCCGACGTGAATCGAA  |
| tRNA-ala (anticodon:AGC) forward          | GGGGATGTAGCTCAGATGGT  |
| tRNA-ala (anticodon:AGC) reverse          | TGGAGATGCGGGGTATCG    |

## **ADDITIONAL SUPPLEMENTAL FILES**

**Supplemental Files 1 and 2 must be downloaded separately.**

**Supplemental File 1:** Homology-based prediction of *Arabidopsis* tRNA family modification sites. Families of tRNA loci in *Arabidopsis* were collapsed to consensus sequences, and yeast modifications were lifted over based upon sequence homology. Table is in BED format, with the following columns from left to right: tRNA family consensus sequence, 0-based start, 1-based stop, modification type (MODOMICS short name), supporting yeast sequence, strand (not applicable). Note that modifications are duplicated when supported by multiple yeast sequences, and should be collapsed with a tool such as Bedtools merge (<http://bedtools.readthedocs.org/en/latest/content/tools/merge.html>) before use in analysis.

**Supplemental File 2:** Homology-based prediction of *Arabidopsis* tRNA locus modification sites. Family-based predicted tRNA loci in *Arabidopsis* were assigned to all loci of each corresponding family. Table is in BED format, with the following columns from left to right: *Arabidopsis* chromosome, 0-based start, 1-based stop, modification type (MODOMICS short name), *Arabidopsis* transcript name, strand.
